# Supplementary material for: Information content in reflected signals during GPS Radio Occultation observations
Source: Copernicus journal article supplement (doi:10.5194/amt-11-1883-2018), 2018-04-05
Supplement: Supplementary file 1 [file amt-11-1883-2018-supplement.zip]

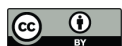

## *Supplement of*

# **Information content in reflected signals during GPS Radio Occultation observations**

**Josep M. Aparicio et al.**

*Correspondence to:* Josep M. Aparicio ([josep.aparicio@canada.ca](mailto:josep.aparicio@canada.ca))

- [amt-11-1883-2018-supplement-title-page.pdf](#)
- [Supplemental\\_Movie\\_01.mp4](#)
- [Supplemental\\_Movie\\_02.mp4](#)

The copyright of individual parts of the supplement might differ from the CC BY 4.0 License.
